# Supplementary material for: The Liberfarb syndrome, a multisystem disorder affecting eye, ear, bone, and brain development, is caused by a founder pathogenic variant in the PISD gene
Source: PubMed Central journal article supplement — Genet Med. 2019 Jul 2;21(12):2734–43. doi: 10.1038/s41436-019-0595-x (PMC6892740; doi:10.1038/s41436-019-0595-x), 2019-07-02
Supplement: 41436_2019_595_MOESM1_ESM.pdf [file 41436_2019_595_MOESM1_ESM.pdf]

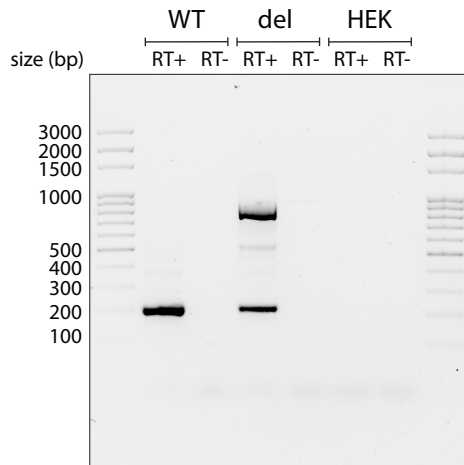

**Supplementary Figure 1** Electrophoresis pattern of the RT-PCR products (RT+) and the negative control missing reverse transcription (RT-) from transcripts of HEK293T cells transfected with a mutated (del) and a wild-type (WT) minigene plasmid bearing exons 8 to 9 of PISD, as well as from untransfected HEK293T cells (HEK). No endogenous transcript appears to be amplified from untransfected cells.
